# Supplementary material
Source: Springer Nature journal article supplement (https://www.springermedizin.de/resource/supplementary/13058_2012_3195_MOESM12_ESM.pdf/9703468)

■ Wip1 WT

■ Wip1 KO

WT;MMTV-Neu

KO;MMTV-Neu

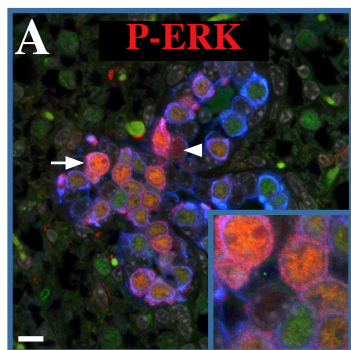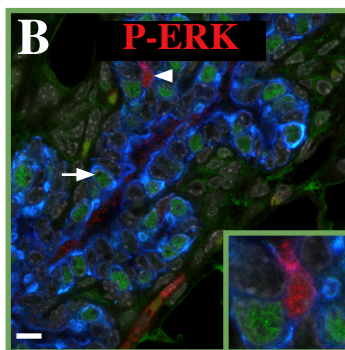

C

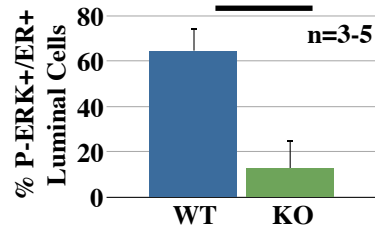

P-ERK ER CK8 DAPI

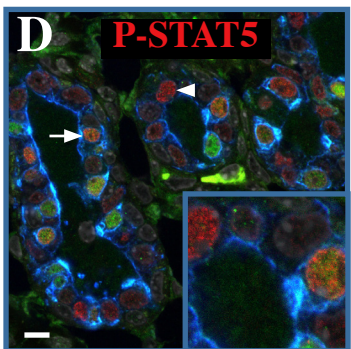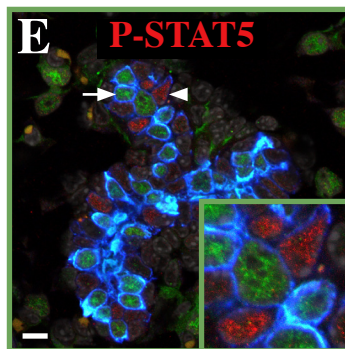

F

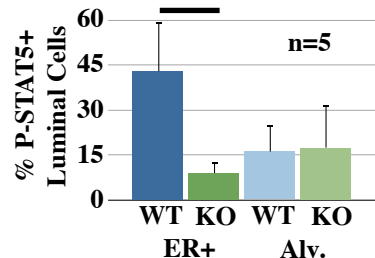

P-STAT5 ER CK8 DAPI

**G**

|    |      | Virgin  |         | Pregnant |         | MMTV-Neu |       |
|----|------|---------|---------|----------|---------|----------|-------|
|    |      | P-STAT5 | P-STAT5 | P-STAT5  | P-STAT5 | P-STAT5  | P-ERK |
| WT | ER+  | +++     | +++     | +++      | +++     | +++      | +++   |
|    | Alv. | +/-     | +++     | +++      | ++      | ++       | ++    |
| KO | ER+  | +/-     | +++     | +++      | +/-     | +/-      | +/-   |
|    | Alv. | +/-     | +++     | +++      | ++      | +        | +     |

H

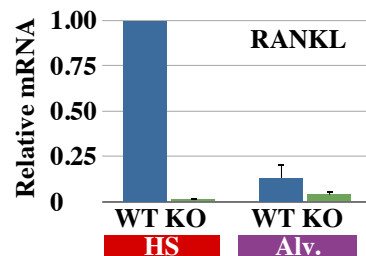

Supplement: MOESM12 [file 9703468]
